# Supplementary material for: The mechanism of quenching of the lanthanide excited state for optical probes using sensitised emission
Source: Royal Society of Chemistry journal article supplement (doi:10.1039/b916794n), 2009-01-01
Supplement: b916794n.pdf [file b916794n.pdf]

**ESI: The mechanism of quenching of the lanthanide excited state for optical probes using sensitised emission**

*Ga-Lai Law, David Parker\*, Siobhan L. Richardson and Ka-Leung Wong*

**ESI**

- 1. Ligand and Complex Synthesis**
- 2. Mass spectra for [Tb.L<sup>6</sup>]<sup>+</sup> showing deuterium incorporation on photolysis in D<sub>2</sub>O.**

**2. Synthesis of L<sup>5</sup> and L<sup>6</sup> and their Eu and Tb complexes**

**N-Chloroethanoyl-3, 4-methylenedioxybenzylamine**

3,4-Methylenedioxybenzylamine (0.13 ml, 1.04 mmol) and 1-(2-chloroacetyl)pyrrolidine-2,5 – dione (200 mg, 1.04 mmol) were dissolved in dry triethylamine (0.18 ml, 1.25 mmol) and THF (5 ml) and the solution stirred at room temperature for 2 h. . The thick white precipitate that formed was filtered and the solid washed with THF. The solvent was removed to yield a yellow oil which was treated with methanol (10 ml) to give a yellow solid. The solid was dissolved in chloroform (20 ml) and successively washed with water (pH 2, 7, 9), dried (K<sub>2</sub>CO<sub>3</sub>) , filtered and solvent removed to yield a pale yellow solid (170 mg, 0.75 mmol, 72%). R<sub>f</sub> = 0.75 (5% MeOH:DCM). M.p: 113 -114 °

δ<sub>H</sub> (CDCl<sub>3</sub>) 4.09 (2H, s, CH<sub>2</sub>Cl), 4.39 (2H, d, *J* 6.0, CH<sub>2</sub>NH), 5.95 (2H, s, OCH<sub>2</sub>O), 6.77 (3H, m, 3 x benzyl H); δ<sub>C</sub> (CDCl<sub>3</sub>, 125MHz) 42.7 (CH<sub>2</sub>Cl), 43.8 (CH<sub>2</sub>NH), 101.3 (OCH<sub>2</sub>O); 108.5, 108.6, 121.4, 131.2, 147.4, 148.1 (aryl C), 165.8 (C=O); *m/z* (ESMS<sup>+</sup>) 228 (M + H, 15%), 250 (M + Na, 100%). Calc. For C<sub>10</sub>H<sub>10</sub>NO<sub>3</sub>Cl : C:52.76; H:4.43 N: 6.15%. Found: C: 52.95, H:4.42, N:6.08%.

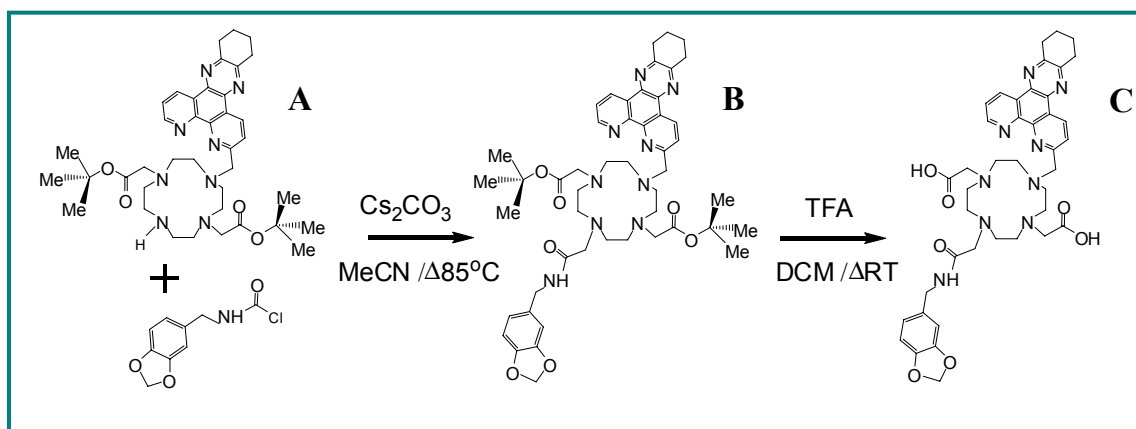

**1-(3-Methyl-10,11,12,13-tetrahydrodipyrido[3,2-a:2',3'-c]phenazine)-4,10-bis(*tert*-butoxycarbonylmethyl)-1,4,7,10-tetraazacyclododecane (A)**

1,7-Bis(*tert*-butoxycarbonylmethyl)-1,4,7,10-tetraazacyclododecane (150 mg, 0.37 mmol), NaHCO<sub>3</sub> (31 mg, 0.37 mmol) and 3-chloromethyl-10,11,12,13-tetrahydro-dipyrido[3,2-a:2',3'-c]phenazine (125 mg, 0.37 mmol) were stirred in dry acetonitrile (5 ml) at 70°C under argon monitoring for 100 h, monitoring reaction progress by 1-H NMR. The reaction mixture was filtered and solvent removed under reduced pressure, to yield a residue that was purified by column chromatography on silica, (DCM → 5% MeOH:DCM, R<sub>f</sub>=0.20, 5% MeOH:DCM) to yield a pale yellow oil (170 mg, 0.64 mmol, 53%). δ<sub>H</sub> (CDCl<sub>3</sub>) 1.36 (18H, s, 2 x <sup>t</sup>Bu), 2.09 (4H, m, 2 x CH<sub>2</sub>), 2.68-3.06 (16H, m br, 8 x cyclen CH<sub>2</sub>), 3.24 (4H, m, 2 x CH<sub>2</sub>), 3.63 (4H, m, 4 x CH<sub>2</sub>CO<sub>2</sub><sup>t</sup>Bu), 4.08 (2H, s, CH<sub>2</sub>dpqC), 7.76 (1H, d, *J* 8.0, ArH), 7.90 (1H, dd, *J* 4.4, 8.0, ArH), 9.43 (1H, d, *J* 8.0, ArH), 9.51 (1H, dd, *J* 1.6, 8.0, ArH), 9.81 (1H, dd, *J* 1.6, 4.4, ArH); *m/z* (ESMS<sup>+</sup>) 669 (M + H, 100%). HRMS (ES<sup>+</sup>): found: 699.4338 (M + H); C<sub>39</sub>H<sub>55</sub>N<sub>8</sub>O<sub>4</sub> requires 699.4341.

**1-(3-Methyl-10,11,12,13-tetrahydrodipyrido[3,2-a:2',3'-c]phenazine)-7-(ethanoyl-3,4-methylenedioxybenzylamine)-4,10-bis(*tert*-butoxycarbonylmethyl)-1,4,7,10-tetraazacyclododecane (B)**

1-(3-Methyl-10,11,12,13-tetrahydrodipyrido[3,2-a:2',3'-c]phenazine)-4,10-bis(*tert*-butoxycarbonylmethyl)-1,4,7,10-tetraazacyclododecane (25 mg, 0.036 mmol) was dissolved in dry acetonitrile (5 ml) with Cs<sub>2</sub>CO<sub>3</sub> (20 mg, 0.057 mmol) and N-chloroethanoyl-3,4-methylenedioxybenzylamine (8 mg, 0.036 mmol) and the mixture was heated at 70°C (bath temperature) under argon for 100 h. The solvent was removed and the crude oil taken into chloroform and washed with water (pH 7, 9), and dried with K<sub>2</sub>CO<sub>3</sub>; removal of solvent yielded a pale brown oil that was used

directly in the next step (26 mg, 0.029 mmol, 81%).  $\delta_{\text{H}}$  ( $\text{CDCl}_3$ ) 1.43 (18H, s, 2 x  $^t\text{Bu}$ ), 2.09 (4H, m), 2.68-3.06 (16H, m br, 8 x cyclen  $\text{CH}_2$ ), 3.24 (4H, m), 3.63 (4H, m, 2 x  $\text{CH}_2\text{CO}_2^t\text{Bu}$ ), 4.08 (2H, s,  $\text{CH}_2\text{dpqC}$ ), 4.38 (2H, d,  $J$  5.6,  $\text{CH}_2\text{NH}$ ), 4.59 (2H, s,  $\text{O}=\text{C}-\text{CH}_2$ ), 5.29 (2H, s,  $\text{OCH}_2\text{O}$ ), 5.86-5.93 (3H, m, 3 x benzyl H), 7.72 (1H, dd,  $J$  8.4, 4.0, ArH), 8.14 (1H, d,  $J$  8.0, ArH), 9.24 (1H, dd,  $J$  3.2, 0.8, ArH), 9.33 (1H, d,  $J$  8.0, ArH), 9.45 (1H, dd,  $J$  8.4, 0.8 ArH).

**1-(3-Methyl-10,11,12,13-tetrahydrodipyrido[3,2-a:2',3'-c]phenazine)-7-(ethanoyl-3,4-methylenedioxybenzylamine)-4,10-bis(carboxymethyl)-1,4,7,10-tetraazacyclododecane, L<sup>6</sup>**

1-(3-Methyl-10,11,12,13-tetrahydrodipyrido[3,2-a:2',3'-c]phenazine)-7-(ethanoyl-3,4-methylenedioxybenzylamine)-4,10-bis(*tert*-butoxycarbonylmethyl)-1,4,7,10-tetraazacyclododecane (25 mg, 0.028 mmol) was stirred in TFA:DCM, 1:1 for 18 h. The solvents were removed and the crude product washed with DCM (3 x 5  $\text{cm}^3$ ) to yield the tris-trifluoroacetate salt of the title compound as a brown oil that was used directly in the following complexation reaction (20 mg, 0.026 mmol, 92%).  $\delta_{\text{H}}$  ( $\text{CDCl}_3$ ) 2.14 (4H, m, H10, H13), 3.29-3.75 (24H, m br, 8 x cyclen  $\text{CH}_2$ , H11, H12, 2 x  $\text{CH}_2\text{CO}_2\text{H}$ ,  $\text{CH}_2\text{dpqC}$ ), 4.40 (2H, d,  $J$  5.6,  $\text{CH}_2\text{NH}$ ), 5.49 (2H, s,  $\text{O}=\text{C}-\text{CH}_2$ ), 5.91 (2H, s,  $\text{OCH}_2\text{O}$ ), 6.82-6.88 (3H, m, 3 x benzyl H), 8.30 (1H, dd,  $J$  8.0, 5.4, ArH), 8.41 (1H, d,  $J$  8.4, ArH), 9.30 (1H, dd,  $J$  5.4, 0.8, ArH), 9.41 (1H, d,  $J$  8.4, ArH), 9.98 (1H, dd,  $J$  8.0, 0.8, ArH).

**[Eu.L<sup>6</sup>]<sup>+</sup>**

1-(3-Methyl-10,11,12,13-tetrahydrodipyrido[3,2-a:2',3'-c]phenazine)-7-(ethanoyl-3,4-methylenedioxybenzylamine)-4,10-bis(carboxymethyl)-1,4,7,10-tetraazacyclododecane (10 mg, 0.013 mmol) and  $\text{EuCl}_3 \cdot 3\text{H}_2\text{O}$  (4.7 mg, 0.013 mmol) were dissolved in  $\text{MeOH}:\text{H}_2\text{O}$  (1:1, 3  $\text{cm}^3$ ). The pH of the solution was adjusted to 5.5 by addition of dilute aqueous KOH solution, and the mixture heated to 90°C for 24 h. The pH of the solution was adjusted to 10, by the addition of dilute aqueous KOH solution. The fine precipitate was removed via centrifugation and the water removed under reduced pressure. The pH was re-adjusted to pH 7 and the solution filtered using syringe filtration. Water was again removed under reduced pressure, yielding the crude complex as a white solid (10 mg, 0.011 mmol, 83%). A small sample of the formate salt was purified by reverse phase HPLC (Phenomenex Synergi 4 micron Fusion-RP80 using 100% water/0.1% formic acid to 100% MeCN /0.1% formic acid at 15 mins) m.p. > 250°C.  $m/z$  (ESMS<sup>+</sup>) 928 ( $\text{M}^+$ , 100%), 926 ( $\text{M}^+$ , 40%), 929 ( $\text{M}^+$ , 30%). HRMS (ES<sup>+</sup>), found: 928.2646 ( $\text{M}^+$ );  $\text{EuC}_{41}\text{H}_{45}\text{N}_9\text{O}_7^+$  requires 928.2649;  $\lambda_{\text{ex}}$  ( $\text{H}_2\text{O}$ ): 348 nm;  $\tau_{\text{H}_2\text{O}}$ : 0.69 ms;  $\tau_{\text{D}_2\text{O}}$ : 1.01 ms;  $\phi_{\text{H}_2\text{O}}$ : 0.049;  $t_{\text{R}}$  (HPLC): 8.35 min

**[Tb.L<sup>6+</sup>]<sup>+</sup>**

This was prepared similarly and purified as the formate salt by reverse phase HPLC, m.p. > 250°C. *m/z* (ESMS<sup>+</sup>) 934 (M<sup>+</sup>, 100%), 935 (M<sup>+</sup>, 45%), 936 (M<sup>+</sup>, 10%), 937 (M<sup>+</sup>, 5%). HRMS (ES<sup>+</sup>), found: 934.2697 (M<sup>+</sup>); TbC<sub>41</sub>H<sub>45</sub>N<sub>9</sub>O<sub>7</sub><sup>+</sup> requires 934.2690; λ<sub>ex</sub> (H<sub>2</sub>O): 348 nm; τ<sub>H<sub>2</sub>O</sub>: 0.47 ms; τ<sub>D<sub>2</sub>O</sub>: 0.69 ms; t<sub>R</sub> (HPLC): 8.30 min. .

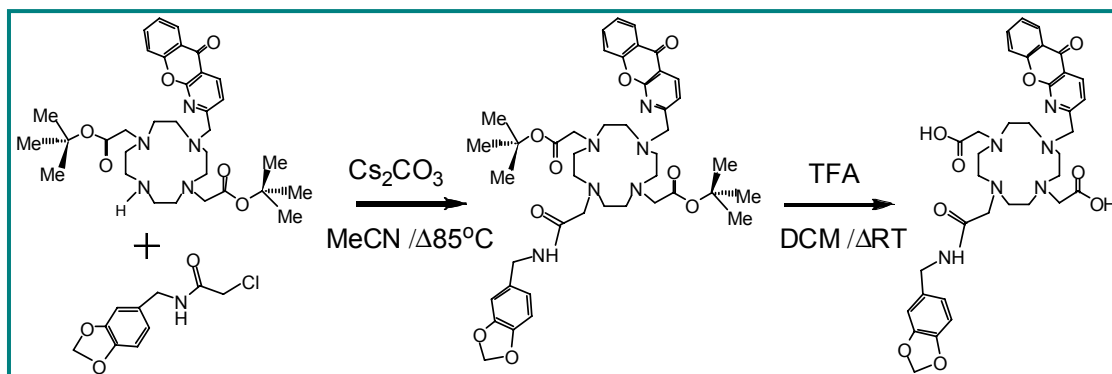

**1-(Methyl-1-azaxanthone)-7-(ethanoyl-3,4-methylenedioxybenzylamine)-4,10-bis(*tert*-butoxycarbonylmethyl)-1,4,7,10-tetraazacyclododecane**

1-(Methyl-1-azaxanthone)-4,10-bis(*tert*-butoxycarbonylmethyl)-1,4,7,10-tetraazacyclododecane (134 mg, 0.22 mmol) was dissolved in dry acetonitrile (5 ml) and Cs<sub>2</sub>CO<sub>3</sub> added (143.4 mg, 0.44 mmol) followed by N-chloroethanoyl-3,4-methylenedioxybenzylamine (50 mg, 0.22 mmol) and the mixture heated at 85° (bath temperature) for 24 h. The mixture was filtered and solvent removed to give a dark brown oil that was purified using column chromatography on silica, (DCM:MeOH, 10:1) to afford a pale brown oil (142.5 mg, 0.178 mmol, 81%).

δ<sub>H</sub> (CDCl<sub>3</sub>, 200 MHz) 8.84 (1H, d, ArH), 8.60 (1H, d, J = 7.8, ArH), 8.19 (1H, dd, J = 8.0, 1.4 ArH), 7.58 (1H, t, J = 8.0, ArH), 7.43 (1H, d, ArH), 7.37 (1H, t, J = 8, 1.4, ArH), 6.83-6.61 (3H, m, ArH), 5.84 (2H, s, OCH<sub>2</sub>O), 4.45 (2H, s, CH<sub>2</sub>NH), 4.30 (2H, s, br, CH<sub>2</sub>), 3.85 (2H, s, br, CH<sub>2</sub>), 2.25-3.36 (20H, m, br, 8 x cyclen CH<sub>2</sub>, 2 x CH<sub>2</sub>), 1.17 (18H, s, br, CH<sub>3</sub>). δ<sub>C</sub> (CDCl<sub>3</sub>) 177.40 (azaxanthone C=O), 171.87 (<sup>t</sup>but C=O), 164.62 (C=O), 160.29 (2C, ArO-C-N, ArC-O), 155.74 (azaxanthone, ArC-N), 147.71 (ArC), 146.46 (ArC), 138.24 (azaxanthone, ArC), 135.81 (azaxanthone, Ar C), 133.64 (ArC), 126.59 (azaxanthone, ArC-H), 124.95 (azaxanthone, Ar C-H), 121.63 (ArC), 120.90 (azaxanthone, Ar C-H), 118.96 (azaxanthone, Ar C-H), 115.50 (azaxanthone, ArC-H), 108.52 (ArC-H), 108.21 (ArC-H), 100.96 (OCH<sub>2</sub>O), 82.27 (2C, <sup>t</sup>but C),

59.9- 57.1 (3C, CH<sub>2</sub> and 8C, cyclen CH<sub>2</sub>), 42.53(CH<sub>2</sub>NH), 28.31 (6C, CH<sub>3</sub>). *m/z* (ESI-MS<sup>+</sup>) (800), 801.0 [M + H]<sup>+</sup>; HRMS(ESI<sup>+</sup>) 801.4182; calc., C<sub>43</sub>H<sub>57</sub>O<sub>9</sub>N<sub>6</sub>, 801.4182 [M+H]<sup>+</sup>.

**1-(Methyl-1-azaxanthone)-7-(ethanoyl-3,4-methylenedioxybenzylamine)-4,10-bis(carboxymethyl)-1,4,7,10-tetraazacyclododecane, L<sup>5</sup>**

1-(Methyl-1-azaxanthone)-7-(ethanoyl-3,4-methylenedioxybenzylamine)-4,10-bis(*tert*-butoxycarbonylmethyl)-1,4,7,10-tetraazacyclododecane (120 mg, 0.15 mmol) was stirred in TFA:DCM, (1:1) for 12 h.. The solvent was removed under reduced pressure to yield a dark oil. The crude material was repeatedly (x 3) dissolved in CH<sub>2</sub>Cl<sub>2</sub> (5 ml) and solvent removed under reduced pressure to facilitate elimination of excess acid and *tert*-butyl alcohol. This yielded a pale brown oil of the tris-trifluoroacetate salt of L<sup>5</sup> that was used directly in the complexation reaction (103 mg, 0.15 mmol, 100%).

$\delta_{\text{H}}$  (CD<sub>3</sub>OD, 400MHz) 8.56-8.64 (1H, d, br, ArH), 8.17 (1H, dd, J = 1.6, ArH), 7.87 (1H, t, J = 7.2, 1.6 ArH), 7.68 (1H, d, J = 8.0, ArH), 7.57-7.63 (1H, d, br, ArH), 7.45 (1H, t, J = 8, 1.2, ArH), 6.75-6.64 (3H, m, ArH), 5.82 (2H, s, OCH<sub>2</sub>O), 4.64-4.84 (1H, s, br, NH), 4.19 (2H, s, CH<sub>2</sub>NH), 3.96-4.02 (4H, m, br), 3.70-3.81 (4H, m, br), 3.10-3.66 (14H, m,br, 8 x cyclen CH<sub>2</sub>) .  $\delta_{\text{C}}$  (CD<sub>3</sub>OD) 177.51(azaxanthone C=O), 160.46 (2C, C=O), 160.07 (NH-C=O), 159.86 (2C, ArO-C-N + ArC-O), 155.78 (ArC-N), 147.98 (ArC-O), 147.13 (Ar C-O), 138.31 (azaxanthone, ArC), 136.11 (azaxanthone, ArC), 131.87 (ArC), 126.09 (azaxanthone, ArC-H), 125.07 (azaxanthone, ArC-H), 121.36 (ArC-H), 121.15 (azaxanthone, ArC-H), 118.74 (azaxanthone, ArC-H), 117.57 (azaxanthone, ArC), 115.73 (azaxanthone, ArC-H), 114.70 (azaxanthone, ArC-H), 108.23(ArC-H), 107.94 (ArC-H), 101.18 (OCH<sub>2</sub>O), 57.48 (4C, CH<sub>2</sub>), 53.22 (8C, cyclen CH<sub>2</sub>), 43.05 (CH<sub>2</sub>NH).

**[Tb.L<sup>5</sup>]<sup>+</sup>**

L<sup>5</sup> (50 mg, 0.073 mmol) and terbium acetate tri-hydrate (43 mg, 0.11 mmol) were dissolved in MeOH:H<sub>2</sub>O (1:3ml). The pH of the solution was adjusted to 5.5 by addition of aqueous KOH solution, and the mixture heated to 90° for 24 h. The pH of the solution was adjusted to 10, by the addition of dilute aqueous KOH solution. The fine precipitate was removed via syringe filtration and the solution was re-adjusted to pH 7. Water was then removed on a freeze dryer, yielding the crude complex as a white solid (39 mg, 0.046 mmol, 64%). A small sample of the formate salt was purified by reverse phase HPLC as described above. *m/z* (ESIMS<sup>+</sup>) (845) 845 [M<sup>+</sup>] HRMS(ESI<sup>+</sup>) 845.1948: C<sub>35</sub>H<sub>38</sub>N<sub>6</sub>O<sub>9</sub>Tb<sup>+</sup> requires 845.1946 [M<sup>+</sup>];  $\lambda_{\text{ex}}$  (H<sub>2</sub>O): 337 nm;  $\tau_{\text{H2O}}$ : 1.65 ms;  $\tau_{\text{D2O}}$ : 2.87 ms;  $\phi$  = 24%;  $\sigma^2$  = 4.7 GM;  $t_{\text{R}}$  (HPLC): 11.0 min. .

### [Eu.L<sup>5</sup>]<sup>+</sup>

This was prepared and purified as the formate salt in a similar manner.  $m/z$  (ESIMS<sup>+</sup>) (839) 839 [M<sup>+</sup>];  $\lambda_{\text{ex}}$  (H<sub>2</sub>O): 337 nm;  $\tau_{\text{H}_2\text{O}}$ : 0.53 ms;  $\tau_{\text{D}_2\text{O}}$ : 1.78 ms;  $\phi$  = 12%;  $t_{\text{R}}$  (HPLC): 11.0 min. .

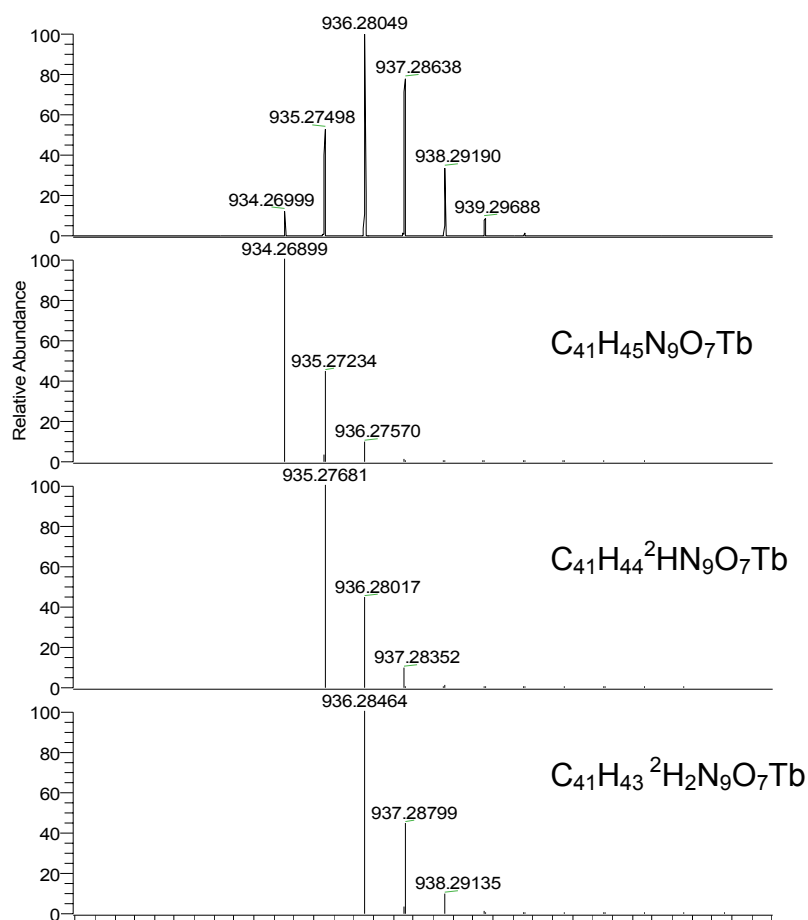

### 2. ESI Figure 1

Mass spectra for [Tb.L<sup>6</sup>]<sup>+</sup>; *top*: observed isotope pattern after 10 min. irradiation (Xe lamp); *lower three*: calculated isotope patterns for [M]<sup>+</sup>; [(M-H) + <sup>2</sup>H]<sup>+</sup>; and [(M-2H) + (<sup>2</sup>H)<sub>2</sub>]<sup>+</sup> .
